# Supplementary material
Source: PubMed Central journal article supplement (PMC7182495)
Supplement: NIHMS1564464-supplement-1.pdf [file NIHMS1564464-supplement-1.pdf]

**Supplementary Table 1. Endoscopic sedation, chronic opioid use, and distension-induced contractility pattern among achalasia patients.** None of the comparisons by contraction pattern presence versus absence were statistically different. RRC – repetitive retrograde contractions.

| <b>FLIP panometry</b>                                        | <b>n</b> | <b>Midazolam, mg;<br/>mean (SD)</b> | <b>Fentanyl, mcg;<br/>mean (SD)</b> | <b>Propofol;<br/>n (%)</b> | <b>Ketamine;<br/>n (%)</b> | <b>Chronic opioid<br/>use; n (%)</b> |
|--------------------------------------------------------------|----------|-------------------------------------|-------------------------------------|----------------------------|----------------------------|--------------------------------------|
| <b>Contractility<br/>present</b>                             | 89       | 7.0 (3.0)                           | 153 (55)                            | 14 (16)                    | 10 (11)                    | 10 (11)                              |
| <b>Contractility<br/>absent</b>                              | 51       | 6.3 (3.5)                           | 138 (63)                            | 12 (24)                    | 6 (12)                     | 3 (6)                                |
|                                                              |          |                                     |                                     |                            |                            |                                      |
| <b>Repetitive<br/>antegrade<br/>contractions<br/>present</b> | 25       | 7.6 (2.2)                           | 164 (42)                            | 2 (7)                      | 2 (7)                      | 3 (11)                               |
| <b>Repetitive<br/>antegrade<br/>contractions<br/>absent</b>  | 115      | 6.4 (3.5)                           | 142 (62)                            | 24 (21)                    | 14 (13)                    | 10 (9)                               |
|                                                              |          |                                     |                                     |                            |                            |                                      |
| <b>RRC pattern<br/>present</b>                               | 41       | 6.2 (2.6)                           | 135 (50)                            | 7 (17)                     | 6 (15)                     | 6 (15)                               |
| <b>RRC pattern<br/>absent</b>                                | 99       | 7.0 (3.4)                           | 153 (60)                            | 19 (19)                    | 10 (10)                    | 7 (7)                                |
